# Supplementary material
Source: MDPI journal article supplement (https://www.mdpi.com/1999-4907/9/8/491)

Supplementary materials

**Figure S1.** Current age class distribution for the four primary forest types across the Superior National Forest, northeastern Minnesota, USA, acquired from the Forest Inventory and Analysis program.

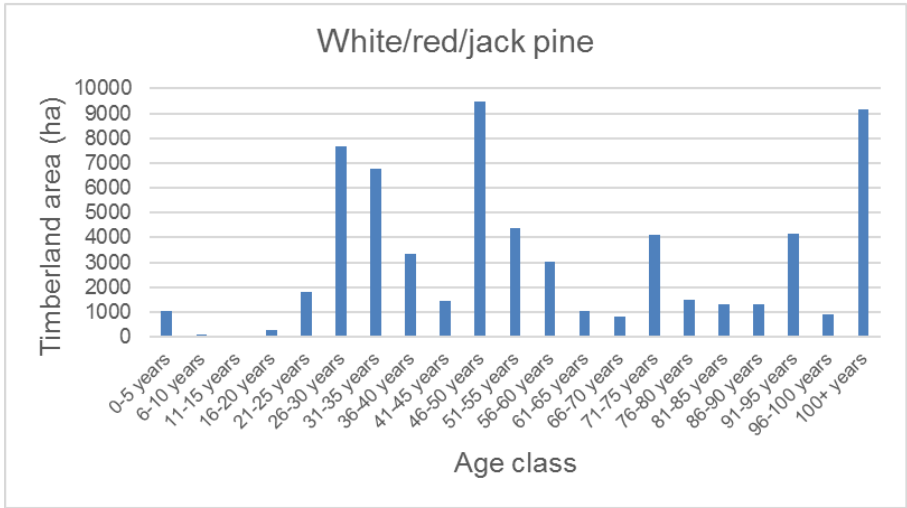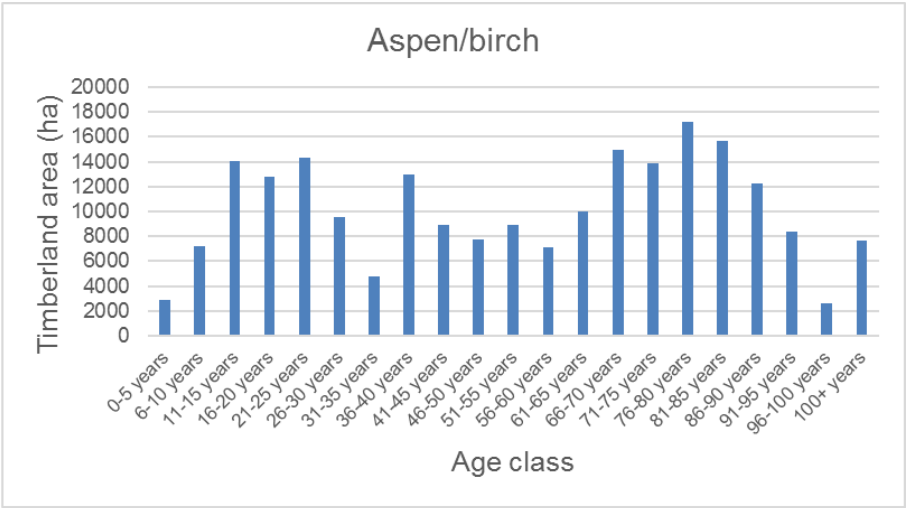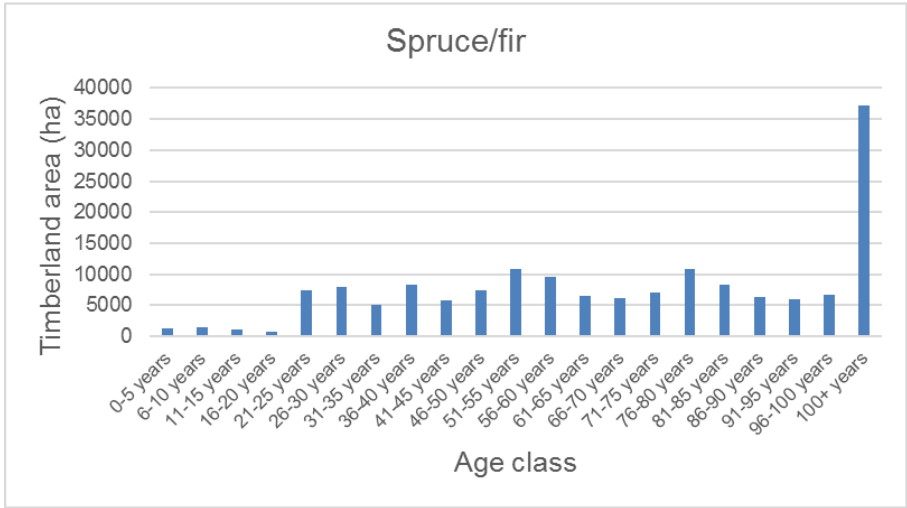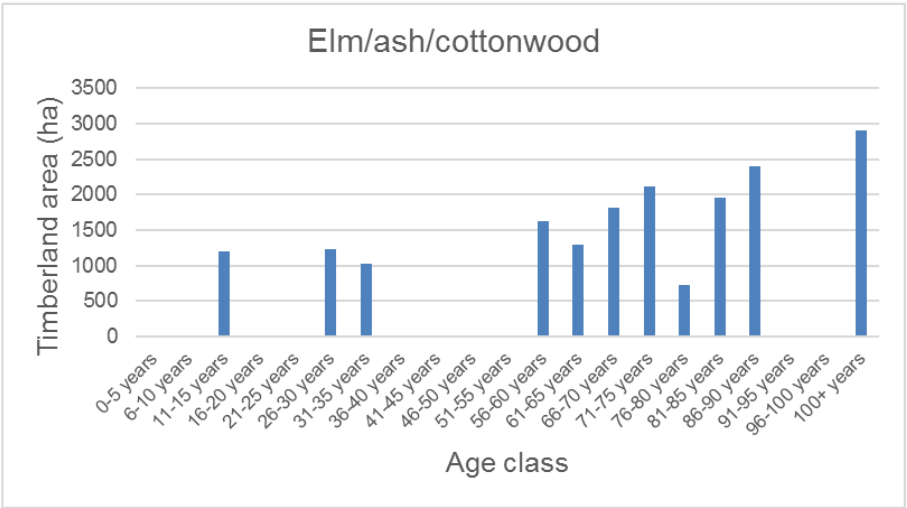

Supplement: s1 [file s1]
